# Supplementary material for: Validation of The Turkish Version of The Obstetric Quality-of-Recovery Score 11 (ObsQoR-11T) After Cesarean Delivery
Source: Research Square preprint supplement (doi:10.21203/rs.3.rs-1133533/v1), 2022-11-29
Supplement: Supplementary file 1 [file 8ba9eb95bdc9b3707bada3c6.docx]

|  Ameliyat Sonrası 24. Saat  Ameliyat Sonrası 25. Saat | | | | | | | | | | | | | | |
| --- | --- | --- | --- | --- | --- | --- | --- | --- | --- | --- | --- | --- | --- | --- |
| **Son 24 saattir nasıl hissediyorsunuz? (0-10, 0:çok kötü ve 10:mükemmel)** | | | | | | | | | | | | | | |
|  | | | **10=Kesinlikle katılmıyorum → → → → → → Kesinlikle katılıyorum=0** | | | | | | | | | | |  |
| 1. | Orta şiddetli ağrım oldu. | 10 | | 9 | 8 | 7 | 6 | 5 | 4 | 3 | 2 | 1 | 0 | |
| 2. | Çok şiddetli ağrım oldu. | 10 | | 9 | 8 | 7 | 6 | 5 | 4 | 3 | 2 | 1 | 0 | |
| 3. | Bulantı ve kusmam oldu. | 10 | | 9 | 8 | 7 | 6 | 5 | 4 | 3 | 2 | 1 | 0 | |
| 4. | Göz kararması yaşadım. | 10 | | 9 | 8 | 7 | 6 | 5 | 4 | 3 | 2 | 1 | 0 | |
| 5. | Titremem oldu. | 10 | | 9 | 8 | 7 | 6 | 5 | 4 | 3 | 2 | 1 | 0 | |
|  | | | **0=Kesinlikle katılmıyorum → → → → → → Kesinlikle katılıyorum=10** | | | | | | | | | | |  |
| 6. | Rahat hissettim. | 0 | | 1 | 2 | 3 | 4 | 5 | 6 | 7 | 8 | 9 | 10 | |
| 7. | Tek başıma hareket edebilirim. | 0 | | 1 | 2 | 3 | 4 | 5 | 6 | 7 | 8 | 9 | 10 | |
| 8. | Bebeğimi yardım almadan tutabiliyorum. | 0 | | 1 | 2 | 3 | 4 | 5 | 6 | 7 | 8 | 9 | 10 | |
| 9. | Bebeğimi yardım olmadan emzirebiliyorum. | 0 | | 1 | 2 | 3 | 4 | 5 | 6 | 7 | 8 | 9 | 10 | |
| 10 | Kişisel bakım ve temizliğimi yapabiliyorum. | 0 | | 1 | 2 | 3 | 4 | 5 | 6 | 7 | 8 | 9 | 10 | |
| 11. | Kontrol altında hissediyorum. | 0 | | 1 | 2 | 3 | 4 | 5 | 6 | 7 | 8 | 9 | 10 | |

**Table 1.** Final Turkish version of the ObsQoR-11
